# Supplementary material for: cGAS and DDX41-STING mediated intrinsic immunity spreads intercellularly to promote neuroinflammation in SOD1 ALS model
Source: PubMed Central journal article supplement — iScience. 2022 May 13;25(6):104404. doi: 10.1016/j.isci.2022.104404 (PMC9194172; doi:10.1016/j.isci.2022.104404), 2022-05-13
Supplement: mmc1.pdf [file mmc1.pdf]

**Supplemental information**

**cGAS and DDX41-STING mediated intrinsic  
immunity spreads intercellularly to promote  
neuroinflammation in SOD1 ALS model**

**Hong Yien Tan, Yean Kong Yong, Yuan Chao Xue, Huitao Liu, Tomomi Furihata, Esaki  
Muthu Shankar, and Chen Seng Ng**

**FIGURE S1**

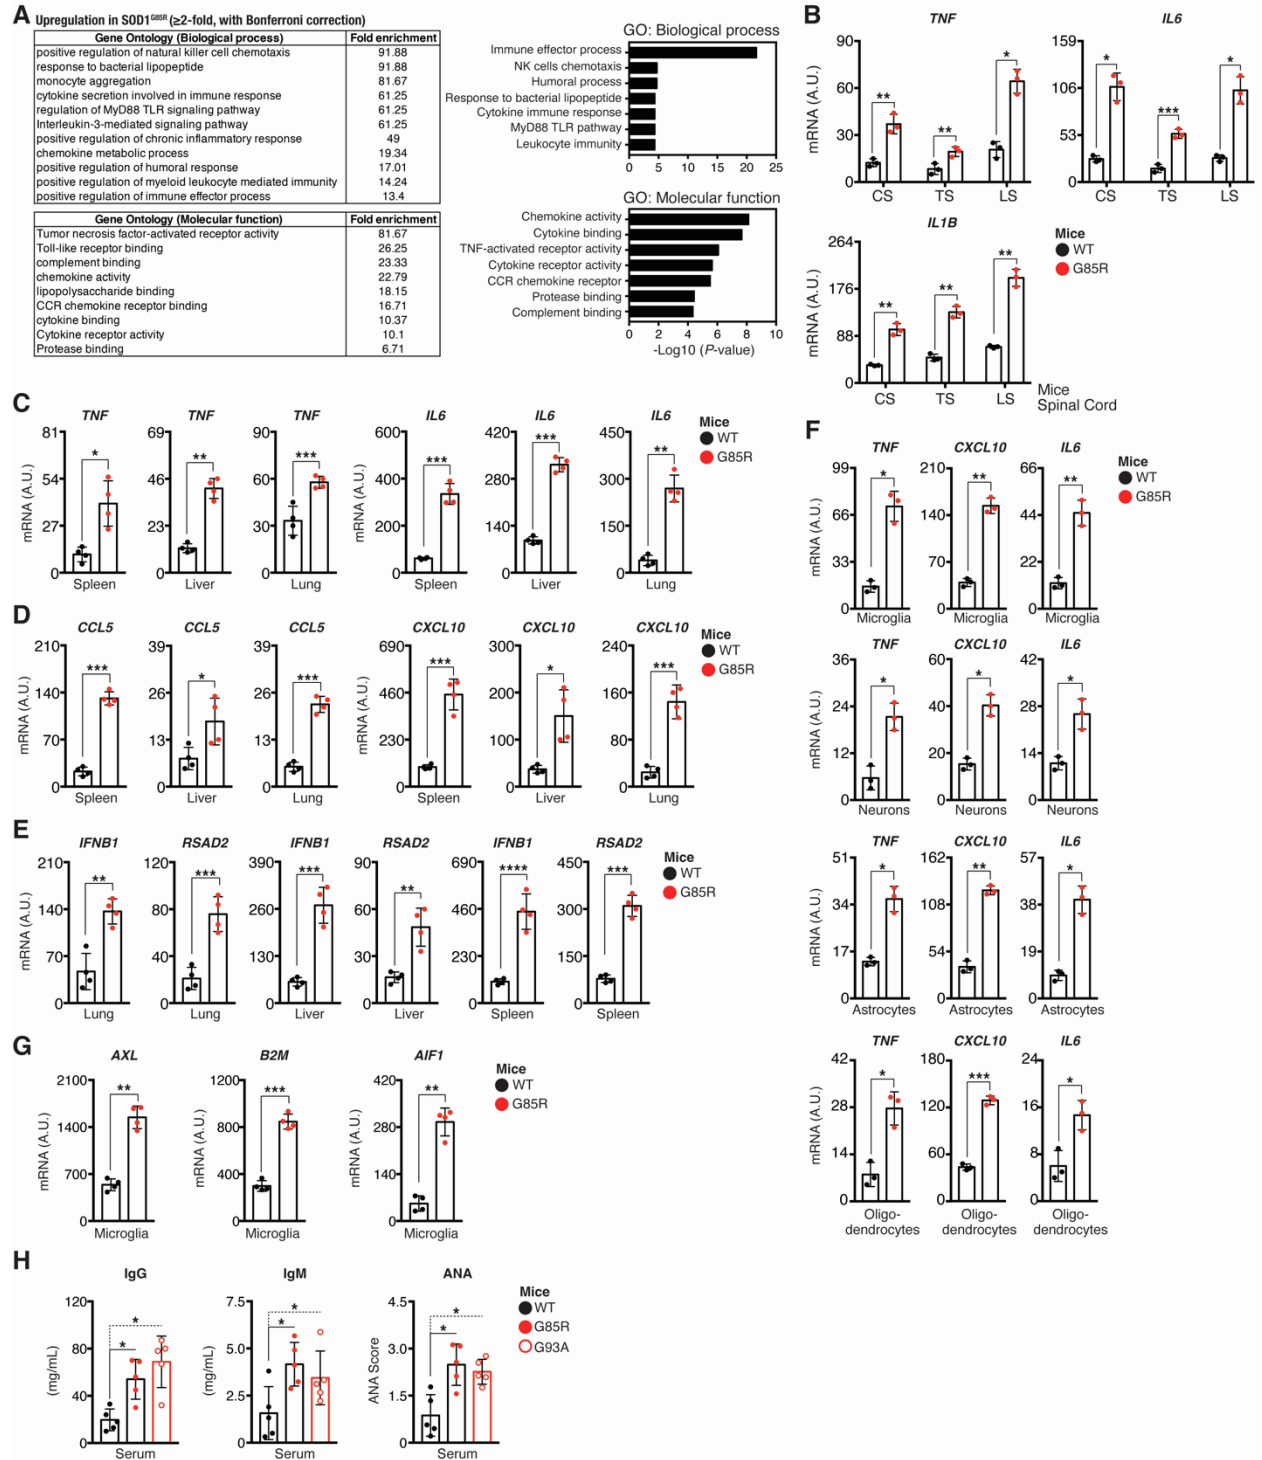

**Figure S1. Immune-profiling of ALS mutants SOD1-G85R mice. (Related to Figure 1)**

(A) Differentially expressed genes with at least two-fold upregulation were subjected to unbiased gene ontology analysis using PANTHER. Categories of molecular function and biological process are shown. (B) Spinal cord from age-matched SOD1 WT or G85R mice were dissected into three sections: cervical (CS), thoracic (TS), and lumbar (LS) sections. The indicated mRNA was analyzed by RT-qPCR. (C-E) The RT-qPCR analysis of the indicated mRNAs in lung, spleen and liver organ lysates obtained from age-matched WT or G85R mice. (F-G) RT-qPCR analysis of the indicated mRNA in primary cells extracted from either WT or G85R mice on day 10 using an immunopanning approach. (H) Total IgG and IgM concentrations and antinuclear antibodies in the serum of mice of the indicated genotypes were measured using ELISA or indirect fluorescence antibody techniques, respectively.

All RT-qPCR was performed using  $\beta$ -actin as the internal control. Each dot represents a mouse of similar age. Data represent the mean of at least three independent experiments (mean $\pm$ SEM). \* $p$ <0.05, \*\* $p$ <0.01, \*\*\* $p$ <0.001, \*\*\*\* $p$ <0.0001; (B-H: two-tailed, unpaired Student's  $t$  test). A.U.=arbitrary units.

**FIGURE S2**

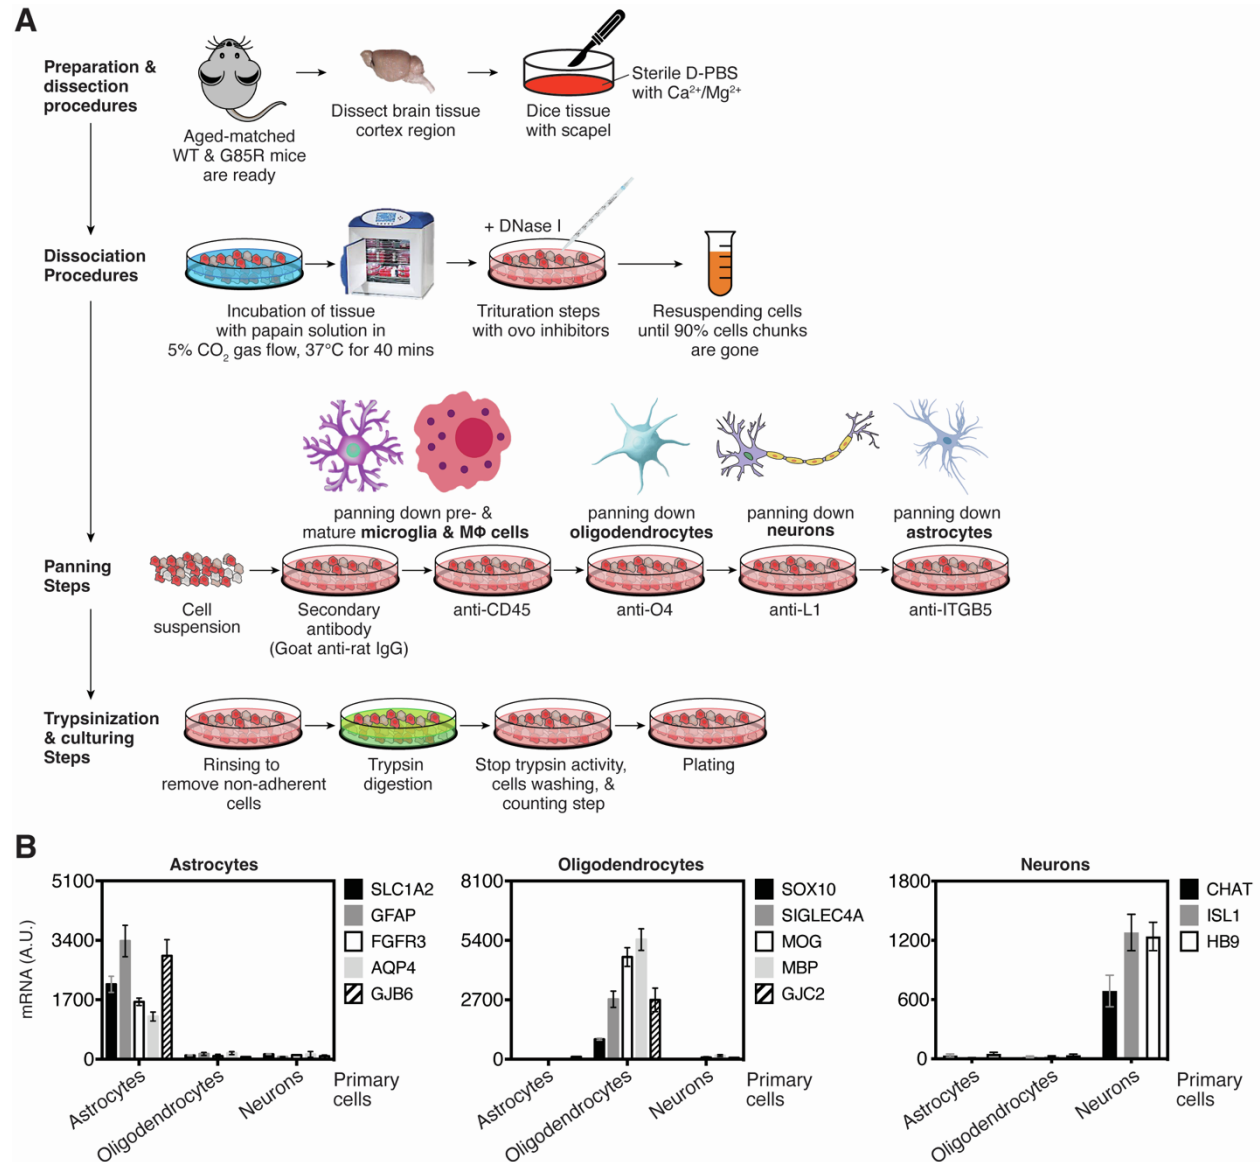

**Figure S2. Immunopanning of primary cells from SOD1-G85R mice. (Related to Figure 1)**

**(A)** Schematic diagram for the purification of primary cells from 10-day-old SOD1 WT and G85R mice using a modified immunopanning protocol involving lineage-specific antibodies. **(B)** The expression of well-described markers for astrocytes, oligodendrocytes, and neurons measured using RT-qPCR with  $\beta$ -actin as an internal control. Data represent the mean of three independent experiments (mean $\pm$ SEM).

**FIGURE S3**

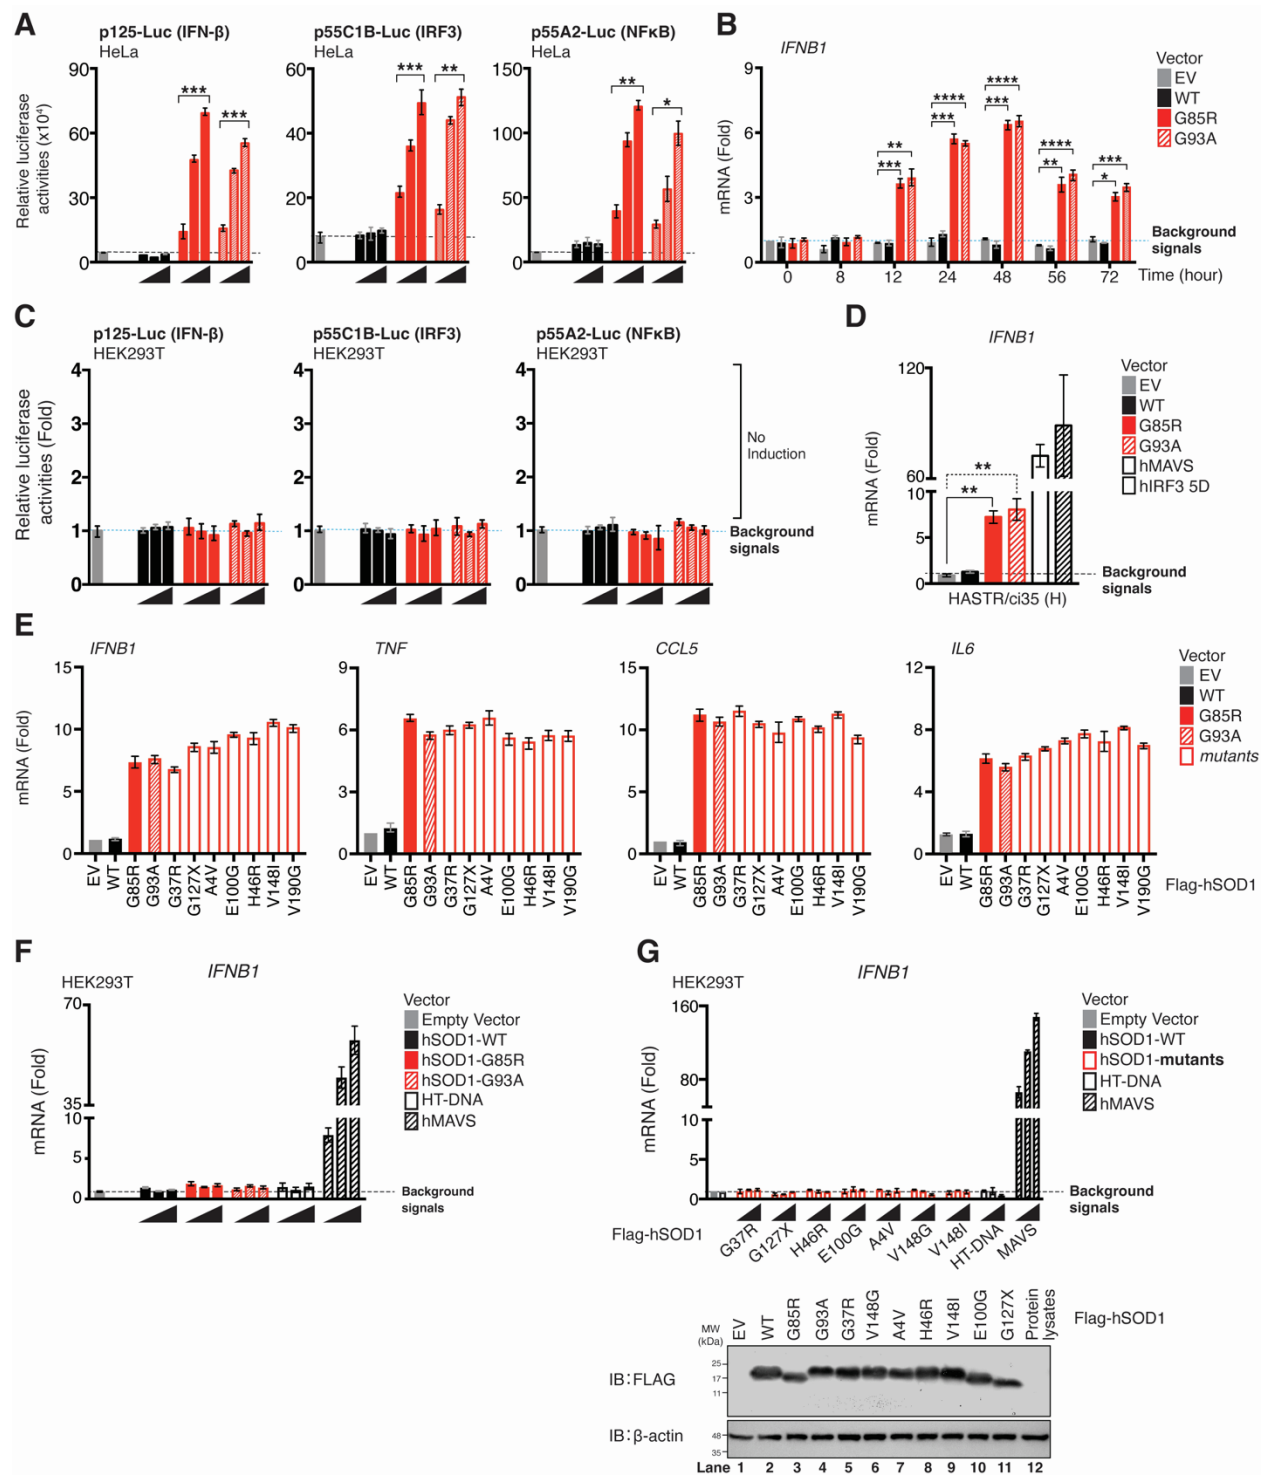

**Figure S3. Overexpression of ALS SOD1-mutants does not activate the IFN-I response in HEK293T cells. (Related to Figure 2)**

(A) HeLa WT cells co-transfected with plasmids encoding EGFP-, human SOD1-WT, -G85R, or -G93A mutant, together with the indicated reporter plasmids (0.01, 0.025 or 0.05 µg). 36 h after transfection, cell lysates were collected and analyzed for luciferase activity. (B) The RT-qPCR analysis of *Ifnb1* mRNA in HeLa cells after transfection with 0.05 µg of the indicated plasmids for the indicated time-points. (C) Similar conditions in panel A but repeated using HEK293T cells. (D) Similar conditions in **Figure 2D** but performed using HASTR/ci35 cells. (E) RT-qPCR analysis of the indicated mRNA in C20 cells after transfection with 0.02 µg of the indicated SOD1-ALS mutant plasmids for 36 h. (F,G) HEK293T cells transfected with the indicated plasmids (0.01, 0.025 or 0.05 µg) for 36 h, or HT-DNA (0.1, 0.25, 0.5 µg/mL) for 8 h. *Ifnb1* mRNA assessed via RT-qPCR with β-actin as the internal control. Protein expression for 0.05 µg transfected samples of each plasmid blotted with the indicated antibodies.

Data represent the mean of three independent experiments (mean±SEM). \* $p < 0.05$ , \*\* $p < 0.01$ , \*\*\* $p < 0.001$ ; (A: one-way ANOVA test; B, D: two-tailed, unpaired Student's *t* test).

**FIGURE S4**

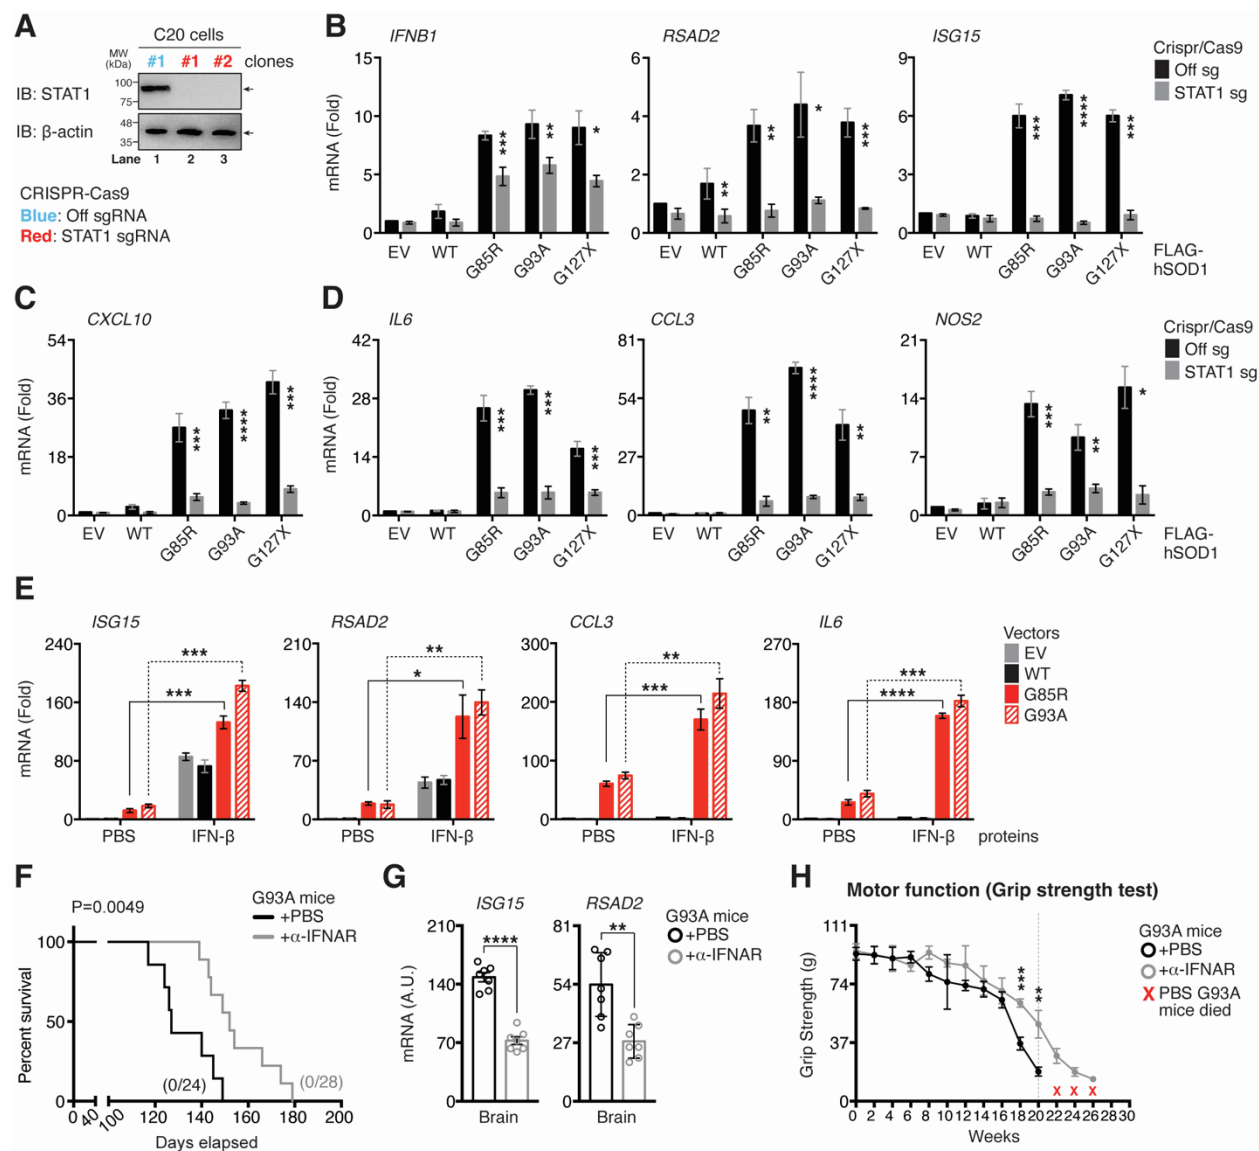

**Figure S4. The ALS SOD1 mutants-dependent pro-inflammatory response requires signaling via the IFNAR receptor. (Related to Figure 3)**

(A) Immunoblotting analysis of WT or STAT1-CRISPR/Cas9-deficient C20 cells. (B-D) WT or STAT1-CRISPR/Cas9-deficient C20 cells transfected with 0.01 µg of Flag-SOD1 WT, G85R, G93A, or G127X plasmids for 36 h, and the indicated mRNA was assessed via RT-qPCR. (E) WT C20 cells treated with PBS, or IFN-β recombinant protein (10 ng/mL) for 24 h, followed by transfection with 0.01 µg of Flag-SOD1 WT, G85R, or G93A plasmids. RNA was purified and the indicated mRNA was measured via RT-qPCR. (F) Survival data of G93A mice in response to challenge with PBS or IFNAR-neutralizing antibody (i.p., 500 µg, twice per week). The number of mice in each condition is indicated. (G) Basal gene expression of *Isg15* or *Rsad2* mRNA *in vivo* in brain homogenates isolated from G93A mice challenged with vehicle (PBS) or IFNAR-neutralizing antibody at Week 21 were analyzed by RT-qPCR. (H) Grip strength test of G93A mice after challenge with either PBS or IFNAR-neutralizing antibody.

All RT-qPCR of RNA samples was normalized to β-actin. Data represent the mean of three independent experiments (mean±SEM). \* $p < 0.05$ , \*\* $p < 0.01$ , \*\*\* $p < 0.001$ , \*\*\*\* $p < 0.0001$ ; (B-E, G-H: unpaired Student's *t* test; F: Log-rank Mantel-Cox test).

**FIGURE S5**

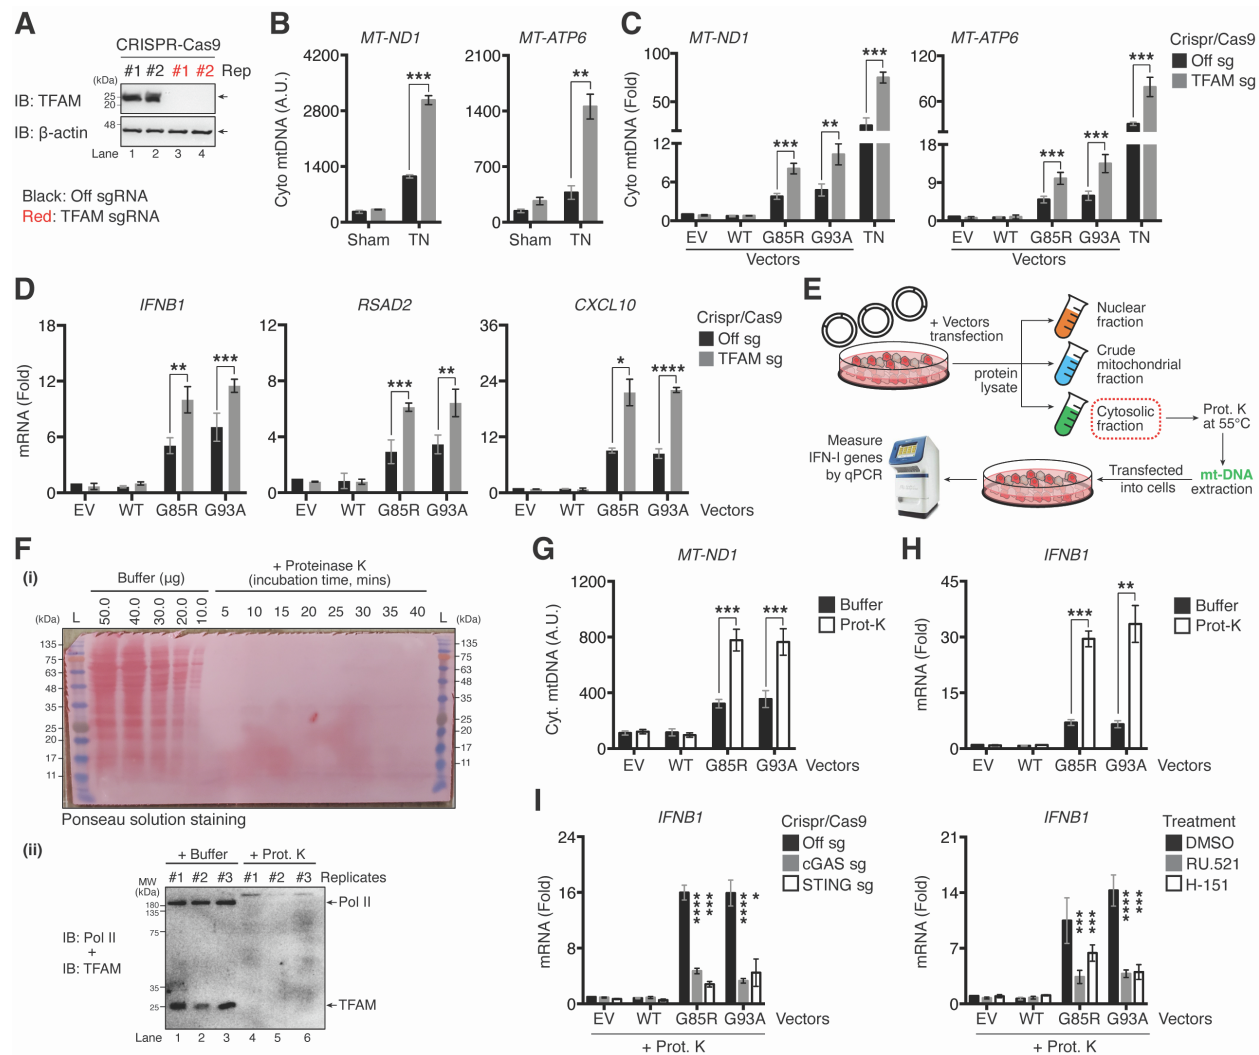

**Figure S5. TFAM-deficiency promotes ALS SOD1-mutants induced IFN-I responses in a cGAS-STING-dependent fashion. (Related to Figure 5)**

(A) TFAM-deficient C20 cells generated through the CRISPR-Cas9 system. Knockout efficiencies were examined via immunoblotting. (B-C) WT or TFAM-deficient C20 cells treated with 1.0 µg/mL of tunicamycin for 8 h, or transfected with plasmids encoding EGFP-, SOD1-WT, SOD1-G85R, or SOD1-G93A mutant. After 36 h of transfection, cells were subjected to subcellular fractionation as described in **Figure 5A**. Total DNA was harvested from cytosolic and nuclear fractions. Cytosolic mtDNA genes expression as assessed via RT-qPCR. (D) WT or TFAM-deficient C20 cells either transfected with plasmids encoding EGFP-, SOD1-WT, SOD1-G85R, or SOD1-G93A mutants. After 36 h of transfection, RNA was purified, and the indicated mRNAs were measured. (E) Schematic diagram for proteinase K treatment experiments. (F) C20 cells subjected to the experimental conditions described in **E** were (i) stained with Ponceau solution for total protein profiling, or (ii) immunoblotted with indicated antibodies. (G) Cytosolic mtDNA genes was assessed via RT-qPCR in C20 cells subjected to the experimental design in **E**. (H) Samples from **G** were re-transfected into WT C20 cells for 8 h. *Ifnb1* mRNA was measured. (I) Proteinase K-treated extracts from **E** were re-transfected into either WT, cGAS or STING-deficient C20 cells for 8 h (*left*), WT C20 cells treated either with vehicle (DMSO), RU.521 or H-151 (*right*). RNA was purified and *Ifnb1* mRNA was measured via RT-qPCR.

FIGURE S6

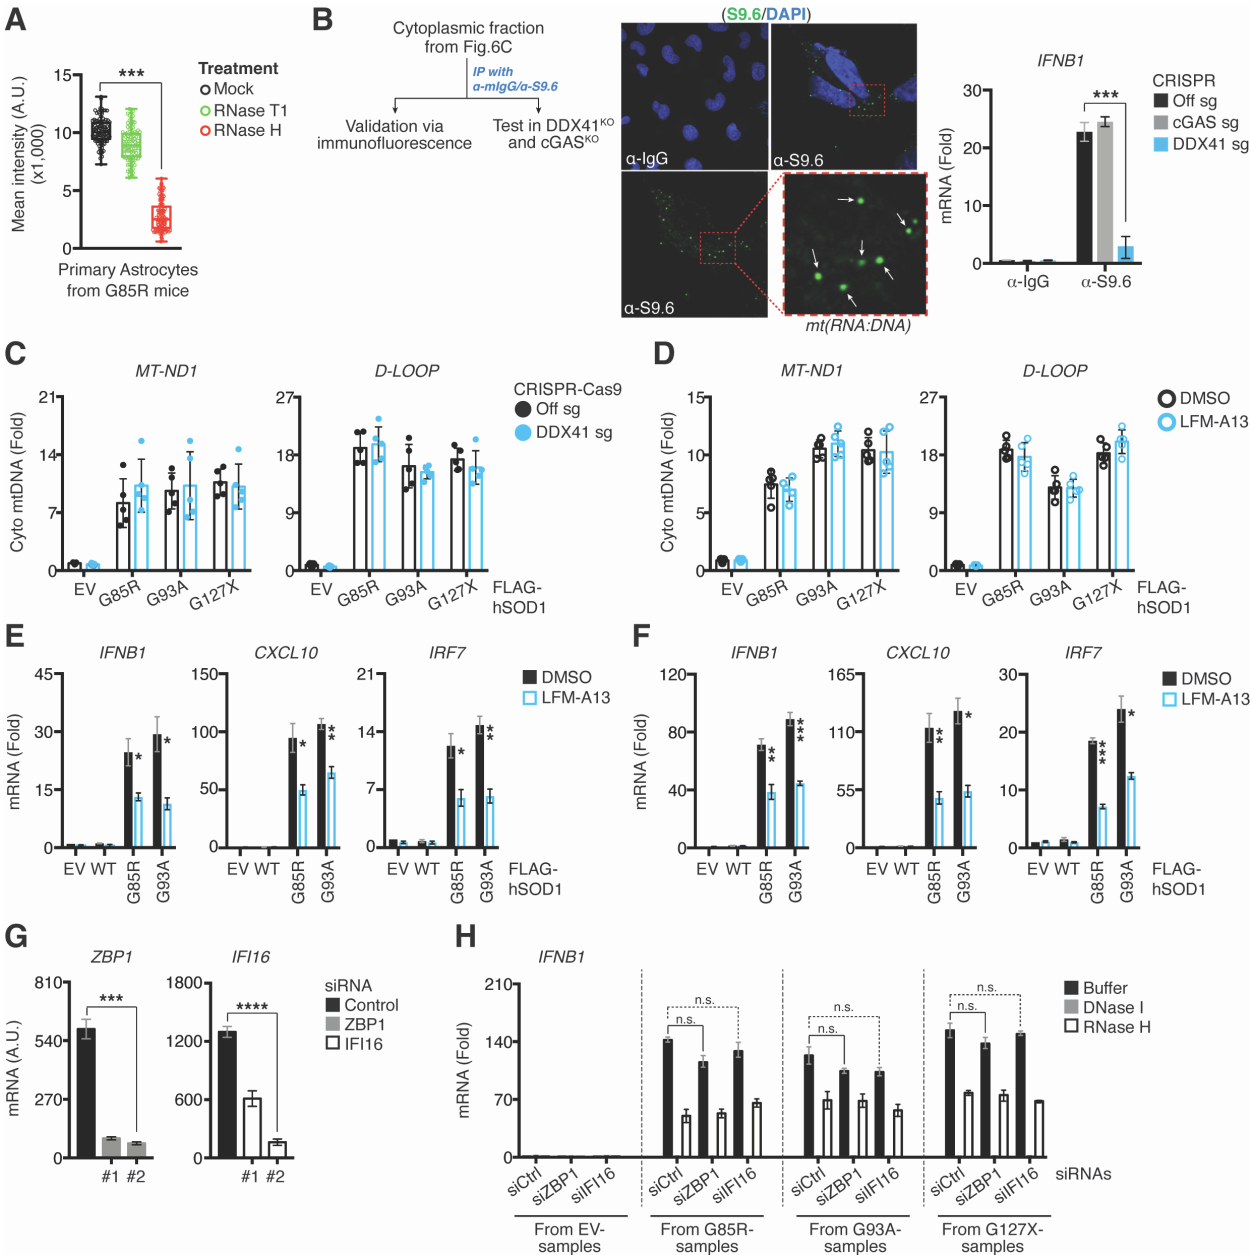

**Figure S6. DAI/ZBP1 and IFI16 is not essential for mtDNA and mt(RNA:DNA) hybrid-dependent IFN-I responses in human microglia cells. (Related to Figure 6)**

(A) PFA-fixed primary astrocytes obtained from G85R mice (**Figure 6A**) were pre-treated either with mock, RNase T1, or RNase H for 1 h at room temperature. Cells ( $n=100$ ) were subjected to single-cell FACS-sorting to quantify the mean S9.6 intensities for individual cells. (B) Pure cytosolic fraction prepared from the experimental design in **Figure 6C** were subjected to immunoprecipitation with IgG antibody or S9.6. Small aliquots of pull-down lysates re-transfected into HeLa cells and immunoassayed with S9.6 and validation of pull-down efficiency and specificity is shown (*left*). mt(RNA:DNA) hybrid indicated by white arrows in box indicated by the enlarged, red-dashed line (*middle*). The remaining pull-down lysates were re-introduced into WT, cGAS-, or DDX41-deficient human microglia for *Ifnb1* mRNA quantification (*right*). (C) WT or DDX41-deficient human microglia transfected with the indicated plasmids were subjected to subcellular fractionation to determine the amount of cytoplasmic mtDNA. (D) Human microglia transfected with the indicated plasmids in the presence or absence of LFM-A13 (100  $\mu$ M) were subjected to subcellular fractionation to determine the amount of cytoplasmic mtDNA. (E,F) Human HASTR/ci35 and murine NSC-34 cells were either transfected with 0.01  $\mu$ g of the indicated plasmids for 36 h in the presence or absence of LFM-A13 (100  $\mu$ M). RNA was purified and the indicated mRNA was measured using RT-qPCR. (G) WT human microglia were transfected with the indicated siRNAs (10 nM) for 48 h. Knockdown efficiency of the indicated genes was examined using RT-qPCR. (H) Pure cytosolic fractions deriving from digitonin extracts of WT C20 cells transfected with 0.01  $\mu$ g of Flag-tagged-empty vector (EV), -G85R, -G93A, or -G127X plasmids were treated with DNase I or RNase H. Samples were then re-transfected into WT C20 cells deficient in genes using the indicated siRNAs. *Ifnb1* mRNA was measured using RT-qPCR.

Quantification of mtDNA genes was normalized to genomic DNA, *TERT*. All RT-qPCR of RNA samples were normalized to  $\beta$ -actin. Data represent the mean of three independent experiments (mean $\pm$ SEM). \* $p<0.05$ , \*\* $p<0.01$ , \*\*\* $p<0.001$ , \*\*\*\* $p<0.0001$ ; (A-B,E-H: unpaired Student's *t* test). A.U.=arbitrary unit; n.s.=non-significant.

**FIGURE S7**

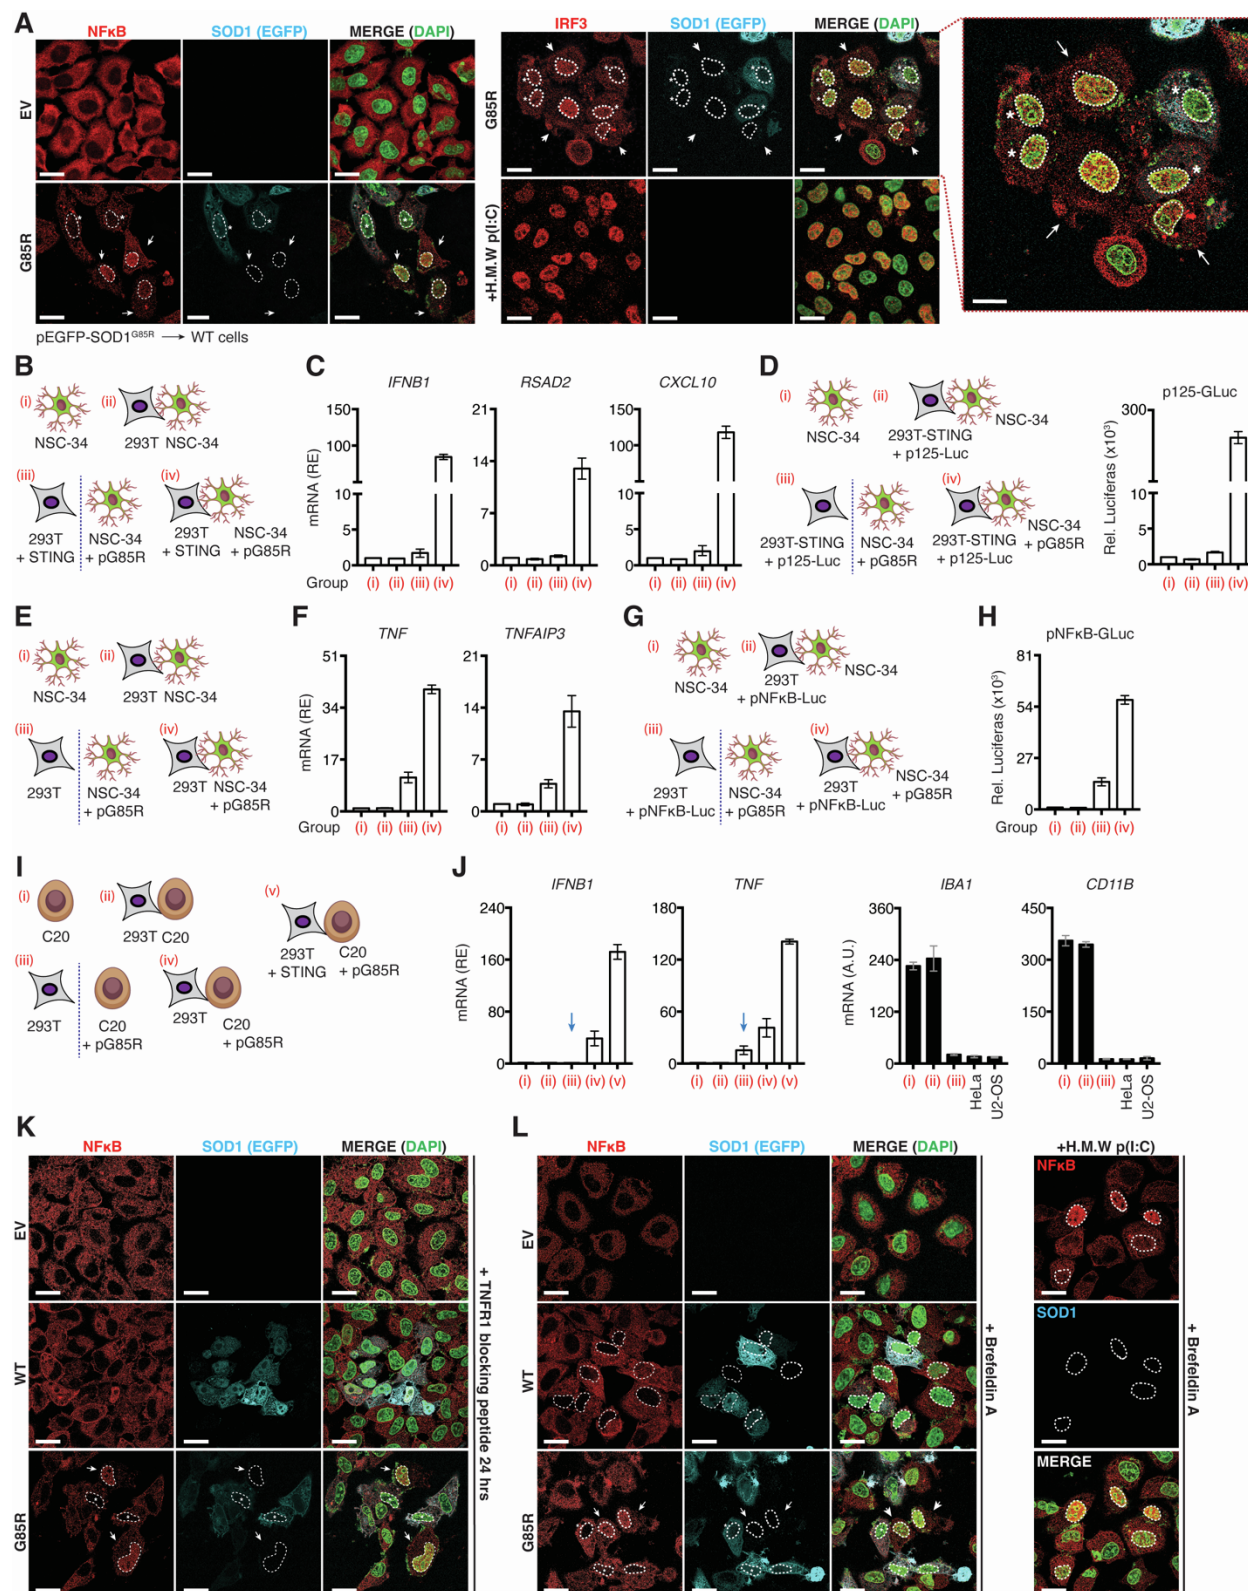

**Figure S7. Cell-cell contact amplifies the propagation of ALS SOD1-mutants induction of IFN-I and pro-inflammatory responses to bystander cells. (Related to Figure 7)**

(A) C20 cells expressing empty vector (EV) or pEGFP-SOD1 G85R were co-cultured with WT cells and immunoassayed with the indicated antibodies. Cells transfected with 0.1 µg of high molecular weight poly(I:C) [H.M.W p(I:C)] served as the negative control. Cells expressing EGFP-SOD1 mutants are marked by as asterisk (\*). Bystander cells with nuclear translocation of NF-κB or IRF3 are indicated by with white arrows. The enlarged box (*right*) shows the merge WT co-cultured cells with microglia expressing SOD1-G85R. (B,C) Schematic view of the experimental design is shown. HEK293T cells or NSC-34 cells in the indicated conditions were co-cultured in the presence or absence of the trans-well system, and the indicated mRNA were measured via RT-qPCR. (D) Schematic view of the experimental design is shown. HEK293T cells expressing STING were co-transfected with p125-luciferase reporter 24 h before NSC-34 donor cells were added in the presence or absence of trans-well system. After 18 h, the luciferase activity was assessed. (E-H) WT HEK293T cells co-cultured with NSC-34 cells in various conditions are shown. The NF-κB luciferase activity and the relative induction of *Irfn1*, or *Tnf* mRNA was measured. (I-J) WT HEK293T cells co-cultured with C20 cells in various conditions is shown. The relative induction of *Tnf*, and *Tnfaip3* mRNA was measured via RT-qPCR. (K,L) EV, WT, or EGFP-SOD1-G85R-expressing microglia were co-cultured with WT cells in the presence of TNFR1 blocking peptide (2.0 µg/mL, 24 h) or Brefeldin A (BFA, 0.1 µM, 2 h). Cells were fixed with 4% PFA and immuno-stained with antibodies targeting NF-κB. Cells expressing EGFP-SOD1 WT or G85R are marked by an asterisk (\*). Bystander cells with nuclear translocation of NF-κB are indicated with white arrows. WT cells transfected with H.M.W. p(I:C) served as the negative control.

All RT-qPCR of RNA samples was normalized to β-actin. Data represent the mean of at least three independent experiments (mean±SEM). White scale bars correspond to 10 µm. \* $p < 0.05$ , \*\* $p < 0.01$ , \*\*\* $p < 0.001$ , \*\*\*\* $p < 0.0001$ .

**A**

C20 cells

MW (kDa)

#1 #2 #1 #2 clones

IB: CX45 48 35 - CX45

IB: CX43 48 35 - CX43

IB:  $\beta$ -actin 48 35 -  $\beta$ -actin

Lane 1 2 3 4

Blue: Control sgRNA

Red: Target sgRNA

**B**

*IFNB1*

mRNA (RE)

Mock LPS p(I:C) IRF3-5D

WT CX36<sup>KO</sup> CX43/45<sup>KO</sup>

*ISG15*

mRNA (RE)

Mock LPS p(I:C) IRF3-5D

WT CX36<sup>KO</sup> CX43/45<sup>KO</sup>

**C**

IFN- $\beta$ /NF $\kappa$ B-reporter

STING<sup>KO</sup> WT CX43<sup>KO</sup> CX45<sup>KO</sup>

(i) WT (ii) CX43<sup>KO</sup> CX45<sup>KO</sup>

■ + pG85R □ + HT-DNA

Rel. Luciferase (x10<sup>3</sup>)

STING<sup>KO</sup>

*IFNB1*

mRNA (RE)

STING<sup>KO</sup>

**D**

*IFNB1* *TNF* *IL6*

mRNA (RE)

Group (i) (ii)

Vector EV G85R G93A

**E**

(Baseline) cGAMP-fluorophore

STING<sup>KO</sup> WT CX43<sup>KO</sup> CX45<sup>KO</sup> CX36<sup>KO</sup>

(i) (ii) (iii)

Mean no. of cells with fluorescence

STING<sup>KO</sup> only (i) (ii) (iii)

*IFNB1*

mRNA (RE)

STING<sup>KO</sup> only (i) (ii) (iii)

**(A)** Knockout efficiency of CX43, CX45 through CRISPR-Cas9 system was verified via immunoblotting. **(B)** WT, CX36-, or CX43/45-double deficient microglia cells were either stimulated with LPS (0.1  $\mu\text{g/mL}$ ), transfected with poly(I:C) [p(I:C), 0.1  $\mu\text{g}$ ] or Flag-tagged-IRF3-5D plasmid (1.0  $\mu\text{g}$ ). Relative expression of *Ifnb1* or *Isg15* mRNA were measured via RT-qPCR. **(C,D)** WT or CX43/45-double deficient microglia cells co-cultured with STING-deficient microglia cells (ratios ranging from 1:0.5 to 1:0.125) containing G85R or HT-DNA (0.1  $\mu\text{g/mL}$ ), followed by transfection with p125-Gluc (IFN- $\beta$ ) or NF- $\kappa$ B-GLuc, luciferase reporter activity **(C)** Expression of indicated mRNA was assessed via RT-qPCR after 24 h **(D)**. **(E)** STING-deficient human microglia cells pre-loaded with cGAMP-labeled fluorophore co-cultured either with WT, CX36, or CX43/45-double deficient cells in equal ratios ( $n=100$  cells for each genotype). 24 h later, cells were trypsinized and subjected to FACS-sorting analysis of single cells positive for fluorescence. Cells from each group were collected from sorter and subjected to RT-qPCR analysis of *Ifnb1* mRNA. All RT-qPCR of RNA samples normalized to  $\beta$ -actin. Data represent the mean of at least three independent experiments (mean $\pm$ SEM). \*\* $p<0.01$ . **(E)**: unpaired Student's  $t$  test).
